# Supplementary material for: DNA Methylation at ATP11A cg11702988 Is a Biomarker of Lung Disease Severity in Cystic Fibrosis: A Longitudinal Study
Source: MDPI journal article supplement (doi:10.3390/genes12030441), 2021-03-19
Supplement: s1 [file s1]

## Homogenization

Isolate plugs from saliva,  
weigh plugs, discard saliva

Add 1:4 w/v Sputolysin® to plugs,  
aspirate several times with pipette

Incubate 15 min at 37°C in a shaking  
water bath. Pipette every 5 min to  
help dispersion

Add PBS in the same volume as  
Sputolysin®, gently shake for  
5 min at room T°

Centrifuge for 10 min at 725 g,  
discard the supernatant

Supernatant can be  
stored at -80 °C for  
analyses of inflammatory  
markers

Resuspend the pellet with 1 ml PBS

Dilute the cell suspension,  
add Trypan blue,  
and count cells

## Cytology

Prepare aliquots of  $\approx 5 \cdot 10^5$  cells  
in 100  $\mu$ l PBS

Use cytofunnels to prepare slides in  
a cytopspin at 500 rpm for 5 min

Stain slides with Diff Kwik kit

Count cell types under microscope

## DNA

Prepare aliquots of  $\approx 3 \cdot 10^6$  cells  
(minimum is 200 000 cells)

Centrifuge for 10 min at 725 g,  
discard the supernatant,  
resuspend the pellet with 200  $\mu$ l PBS

Incubate with RNase A for 10 min  
at 37 °C and 300 rpm

Add proteinase K, vortex.  
Add buffer AL, vortex, and incubate  
for 90 min at 56 °C and 300 rpm

Follow the "Blood or body fluid spin  
protocol" of the QIAamp  
DNA Mini kit from step #5

Pellets can be  
flash frozen in  
liquid nitrogen  
and placed at  
-80 °C for  
delayed DNA  
extraction
